# Supplementary material for: Sustainability 3.0 in Libraries: A Challenge for Management
Source: Preprints.org preprint supplement (doi:10.20944/preprints202212.0150.v1), 2022-12-08
Supplement: Supplementary file 1 [file supplementary]

|                                                                                                      | Concerns<br>(What?)                                                                                    | Values created<br>(What for?)                                                                                                                                                                                                        | Organizational<br>perspective<br>(How?)                                                                                   | External and internal factors<br>influencing libraries                                                                                                                                                                                                                   | Innovations in libraries                                                                                                                                                                                                                                                                                                               |
|------------------------------------------------------------------------------------------------------|--------------------------------------------------------------------------------------------------------|--------------------------------------------------------------------------------------------------------------------------------------------------------------------------------------------------------------------------------------|---------------------------------------------------------------------------------------------------------------------------|--------------------------------------------------------------------------------------------------------------------------------------------------------------------------------------------------------------------------------------------------------------------------|----------------------------------------------------------------------------------------------------------------------------------------------------------------------------------------------------------------------------------------------------------------------------------------------------------------------------------------|
| <b>Sustainability 0.0</b><br><b>Increasing efficiency through centralisation and standardisation</b> | Economic concerns<br> | Institution benefits from centralisation. Increased efficiency through standardisation and automation.                                                                                                                               | Inside-out thinking: "We know what is best for the customer". Focus on large user groups.                                 | <ul style="list-style-type: none"> <li>- Global information overload</li> <li>- Emergence of computing</li> <li>- Strong increase in student numbers</li> <li>- Price spiral, "serials crisis"</li> </ul>                                                                | <ul style="list-style-type: none"> <li>- Rise of common standards and rules</li> <li>- Professionalisation of staff</li> <li>- Large library networks run library management systems</li> <li>- Electronic journals, books and databases</li> </ul>                                                                                    |
| <b>Sustainability 1.0</b><br><b>Strengthening customer orientation</b>                               | Three-dimensional concerns (economic, environmental, social)                                           | Customer and environmental needs are taken in consideration. Reorientation from collection management to the user service.<br>                     | Inside-out thinking: "We listen to our customers".                                                                        | <ul style="list-style-type: none"> <li>- Changing needs of users</li> <li>- User surveys, usage data</li> <li>- Power monopoly of large academic publishers and internet giants (example Google)</li> </ul>                                                              | <ul style="list-style-type: none"> <li>- Library as third place, learning spaces</li> <li>- Usability studies</li> <li>- Emergence of green libraries</li> <li>- Open access offers new opportunities</li> <li>- Project management + marketing in libraries are professionalised</li> </ul>                                           |
| <b>Sustainability 2.0</b><br><b>Sustainability targets as an element of library strategy</b>         | Three-dimensional concerns (economic, environmental, social)                                           | Three-dimensional value creation for broader stakeholder group (triple bottom line). Sustainability targets are part of the library strategy.<br> | Inside-out thinking: "We think and act broadly". High degree of networking between the libraries.                         | <ul style="list-style-type: none"> <li>- Strategic importance of sustainability</li> <li>- New political or legal frameworks (example copyright)</li> <li>- Researchers and funders demand sustainability</li> <li>- Employees claim better work-life balance</li> </ul> | <ul style="list-style-type: none"> <li>- Sustainability targets are part of the library strategy</li> <li>- Open Science gains momentum, introduction of OA monitoring</li> <li>- Sustainability reports</li> <li>- Revised copyright / CC licences</li> <li>- Libraries explore new professional fields (research support)</li> </ul> |
| <b>Sustainability 3.0</b><br><b>The library turns perspective to look from outside-in</b>            | Starting sustainability challenges                                                                     | Sustainability targets are in the foreground. The library thinks and acts globally.                                                                                                                                                  | Outside-in: "We are inspired and guided from the outside; together we contribute to the solution of societal challenges". | <ul style="list-style-type: none"> <li>- Understanding of data and information as common good</li> <li>- Call for radical changes</li> <li>- Self-management, wholeness and evolution of organisations</li> </ul>                                                        | <ul style="list-style-type: none"> <li>- Participation of the library in the value creation process as a whole</li> <li>- New, cross-border forms of collaboration</li> <li>- Increased agility</li> </ul>                                                                                                                             |
| <b>The key shifts involved:</b>                                                                      | <b>1st shift: broadening the business concern</b>                                                      | <b>2nd shift: expanding the value created</b>                                                                                                                                                                                        | <b>3rd shift: changing the perspective</b>                                                                                |                                                                                                                                                                                                                                                                          |                                                                                                                                                                                                                                                                                                                                        |

Table 2: Typology of sustainability in libraries, developed by Alice Keller based on Dyllick and Muff (2016). The black arrows mark the key shifts of each level.
